# Supplementary material for: Novel rhodamine dye with large Stokes shifts by fusing the 1,4-diethylpiperazine moiety and its applications in fast detection of Cu2+
Source: Royal Society of Chemistry journal article supplement (doi:10.1039/d0ra05835a), 2020-01-01
Supplement: d0ra05835a1.pdf [file d0ra05835a1.pdf]

## Supporting information

Novel rhodamine dye with large stokes shifts by fusing the 1,4-diethylpiperazine moiety and its applications in fast detection of  $\text{Cu}^{2+}$

Jin Gong <sup>†,‡</sup>, Chang Liu <sup>†</sup>, Xiaojie Jiao <sup>†</sup>, Song He <sup>†</sup>, Liancheng Zhao <sup>†,‡</sup>, Xianshun Zeng <sup>\*,†,‡</sup>

<sup>†</sup> Tianjin Key Laboratory for Photoelectric Materials and Devices, School of Materials Science & Engineering, Tianjin University of Technology, Tianjin, 300384, China

<sup>‡</sup> School of Materials Science and Engineering, Harbin Institute of Technology, Harbin, 150001, China

\*E-mail: xshzeng@tjut.edu.cn

## Table of contents

|                                                                                                   |       |
|---------------------------------------------------------------------------------------------------|-------|
| Figure S1: Absorption and fluorescence spectra of <b>JRQ</b> .....                                | S3    |
| Table S1: Photophysical properties of <b>JRQ</b> in different solvents.....                       | S3    |
| Figure S2: MTT assay of <b>JRQ</b> .....                                                          | S3    |
| Figure S3: Cell imaging of <b>JRQ</b> .....                                                       | S3    |
| Table S2: Overlap coefficients and Pearson's coefficients <b>JRQ</b> .....                        | S4    |
| Figure S4: Absorption spectra changes of <b>JRQN</b> towards metal ions.....                      | S4    |
| Figure S5: Absorption and emission spectra of <b>JRQN</b> upon addition of $\text{Hg}^{2+}$ ..... | S4    |
| Figure S6: HRMS of <b>JRQN</b> in the presence of $\text{Cu}^{2+}$ ions.....                      | S4    |
| Figure S7: Absorption spectra changes of <b>JRQN</b> .....                                        | S4    |
| Figure S8: MTT assay of <b>JRQN</b> .....                                                         | S5    |
| Table S3: Overlap coefficients and Pearson's coefficients of <b>JRQN</b> .....                    | S5    |
| $^1\text{H}$ , $^{13}\text{C}$ NMR spectra and HRMS of compounds.....                             | S6-S8 |

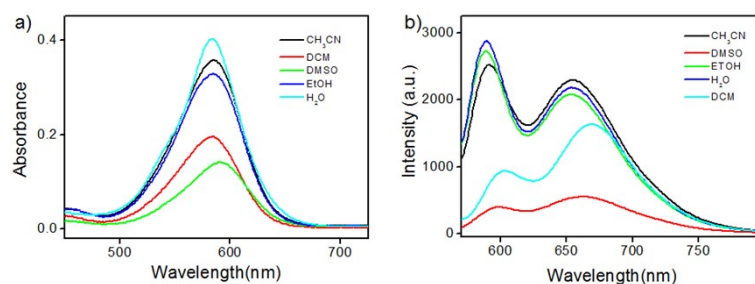

**Fig. S1** Absorption a) and fluorescence b) spectra of **JRQ** in different solvents.

**Table S1.** Photophysical properties of **JRQ** in different solvents.

| Solvent            | $\lambda_{\text{Abs}}$<br>(nm) | $\lambda_{\text{em}}$<br>(nm) | $\lambda_{\text{ex}}$<br>(nm) | $\epsilon_{\text{b}}$<br>( $\text{M}^{-1} \text{cm}^{-1}$ ) | Stocks Shift<br>(nm) | $\Phi^a$ |
|--------------------|--------------------------------|-------------------------------|-------------------------------|-------------------------------------------------------------|----------------------|----------|
| DCM                | 585                            | 668                           | 613                           | 19500                                                       | 55                   | 0.54     |
| CH <sub>3</sub> CN | 585                            | 654                           | 593                           | 35700                                                       | 61                   | 0.05     |
| H <sub>2</sub> O   | 583                            | 654                           | 585                           | 42000                                                       | 69                   | 0.18     |
| DMSO               | 590                            | 662                           | 600                           | 14200                                                       | 62                   | 0.20     |
| EtOH               | 585                            | 655                           | 592                           | 32800                                                       | 63                   | 0.09     |

<sup>a</sup> Relative fluorescence quantum yield estimated by using Nile Blue ( $\Phi_{\text{B}} = 0.27$  in ethanol) as a fluorescence standard.

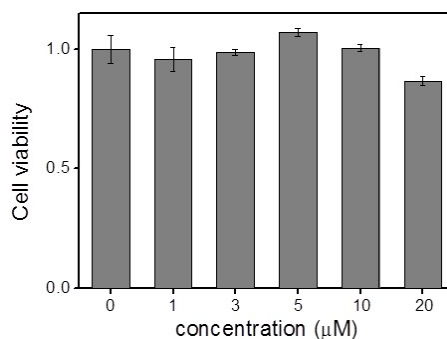

**Fig. S2** MTT assay of **JRQ**.

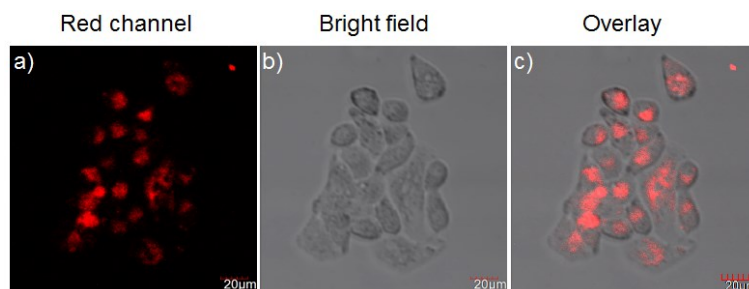

**Fig. S3** Fluorescent images of HeLa cells incubated with **JRQ** (1  $\mu\text{M}$ ) for 30 min.  $\lambda_{\text{ex}} = 559 \text{ nm}$ ,  $\lambda_{\text{em}} = 618\text{--}718 \text{ nm}$ .

**Table. S2** Overlap coefficients and Pearson's coefficients of commercial targeting reagents and **JRQ**

| Reagents            | Overlap | Pearson's |
|---------------------|---------|-----------|
| Mito-Tracker Green  | 0.92    | 0.91      |
| Lyso-Tracker Green  | 0.80    | 0.78      |
| ER-Tracker Green    | 0.73    | 0.72      |
| Golgi-Tracker Green | 0.80    | 0.79      |

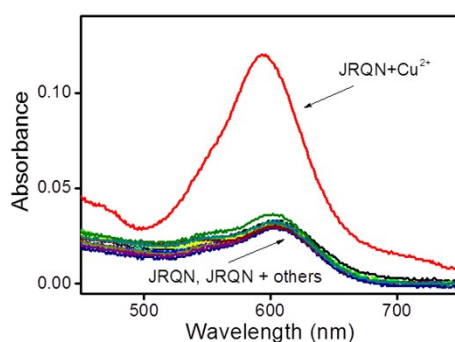

**Fig. S4** Absorption spectra response of **JRQ** (10  $\mu$ M) upon addition of different species (100  $\mu$ M). 1)  $\text{Ag}^+$ ; 2)  $\text{Al}^{3+}$ ; 3)  $\text{Ca}^{2+}$  (10 mM); 4)  $\text{Cd}^{2+}$ ; 5)  $\text{Co}^{2+}$ ; 6)  $\text{Cr}^{3+}$ ; 7)  $\text{Cu}^{2+}$ ; 8)  $\text{Fe}^{2+}$ ; 9)  $\text{Fe}^{3+}$ ; 10)  $\text{Pd}^{2+}$ ; 11)  $\text{K}^+$  (10 mM); 12)  $\text{Li}^+$  (10 mM); 13)  $\text{Mg}^{2+}$  (10 mM); 14)  $\text{Mn}^{2+}$ ; 15)  $\text{Na}^+$ ; 16)  $\text{Ni}^{2+}$ ; 17)  $\text{Zn}^{2+}$ .

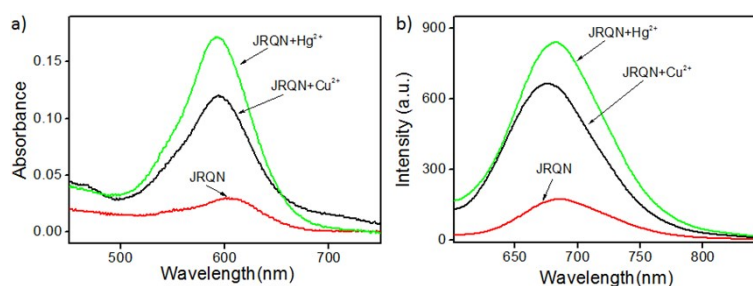

**Fig. S5** Absorption and emission spectra response of **JRQ** (10  $\mu$ M) upon addition of  $\text{Hg}^{2+}$  (100  $\mu$ M).

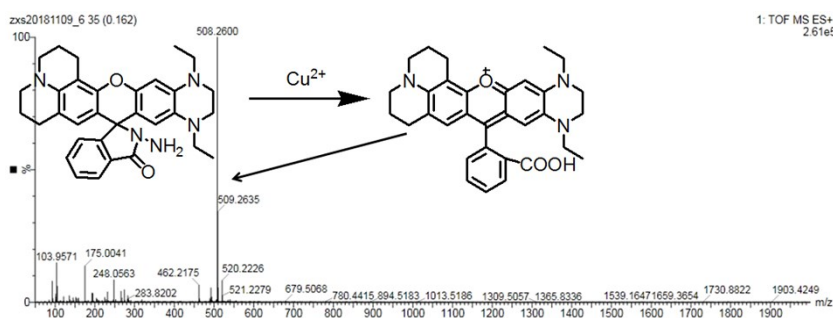

**Fig. S6** HRMS of **JRQ** in the presence of  $\text{Cu}^{2+}$ .

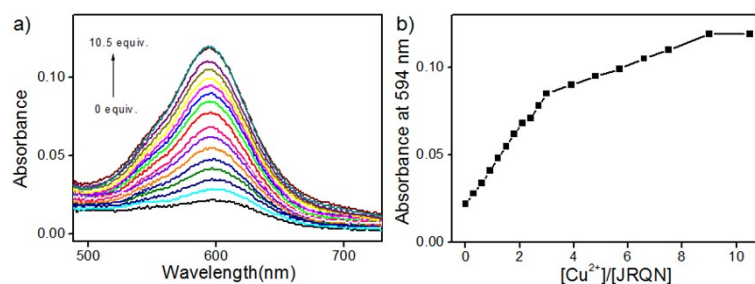

**Fig. S7** a) The absorption spectra changes of **JRQN** (10  $\mu\text{M}$ ) treated with increasing concentrations of  $\text{Cu}^{2+}$  (0–105  $\mu\text{M}$ ); b) The plot of the absorption intensities at 594 nm versus the equiv. of  $\text{Cu}^{2+}$ .

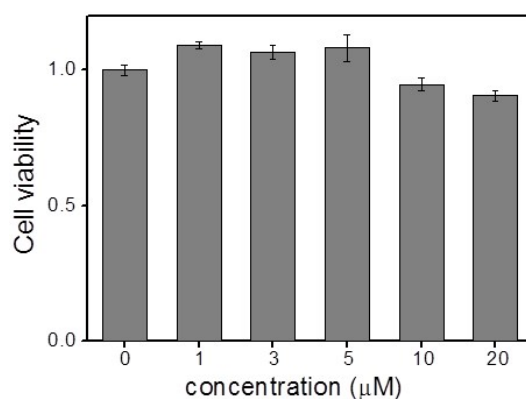

**Fig. S8** MTT assay of **JRQN**.

**Table. S3** Overlap coefficients and Pearson's coefficients of commercial targeting reagents and **JRQN**

| Reagents            | Overlap | Pearson's |
|---------------------|---------|-----------|
| Mito-Tracker Green  | 0.93    | 0.92      |
| Lyso-Tracker Green  | 0.84    | 0.83      |
| ER-Tracker Green    | 0.65    | 0.64      |
| Golgi-Tracker Green | 0.60    | 0.59      |

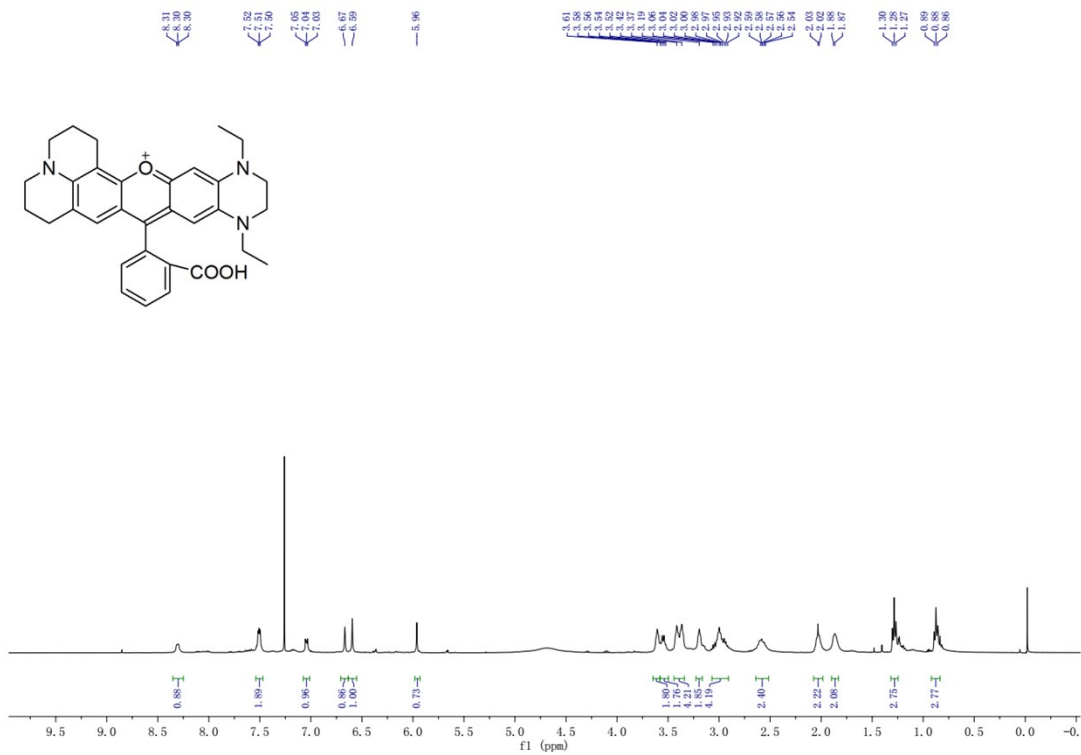

**Fig. S9** <sup>1</sup>H NMR spectra of JRQ in CDCl<sub>3</sub>

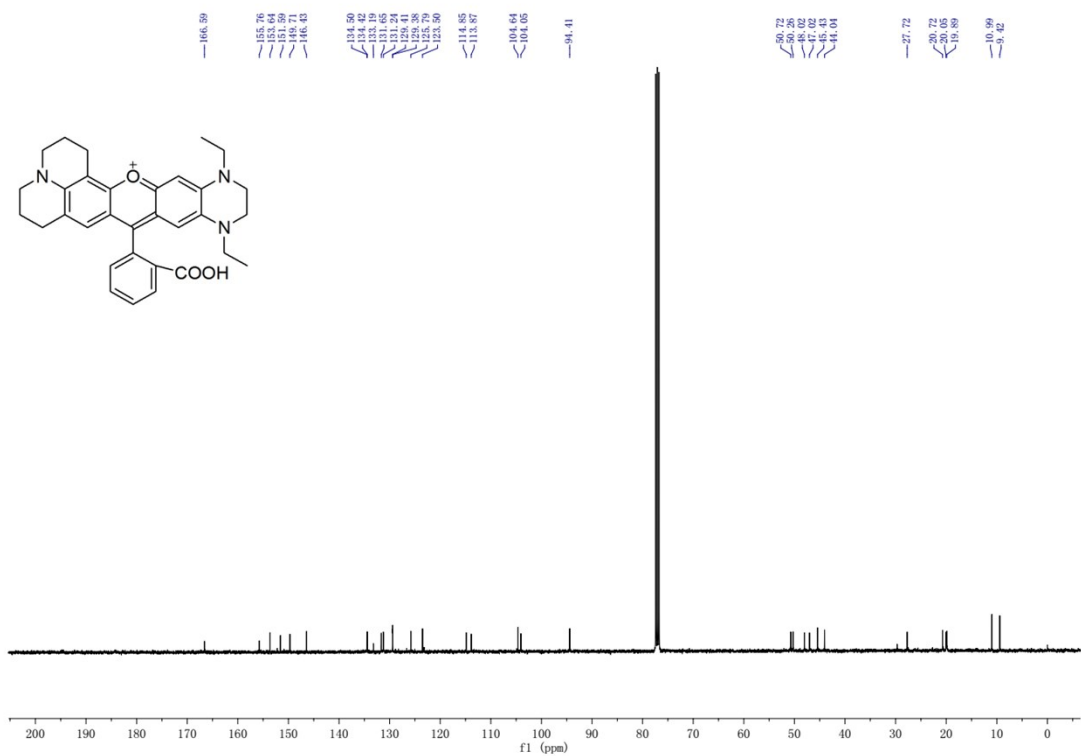

**Fig. S10** <sup>13</sup>C NMR spectra of JRQ in CDCl<sub>3</sub>

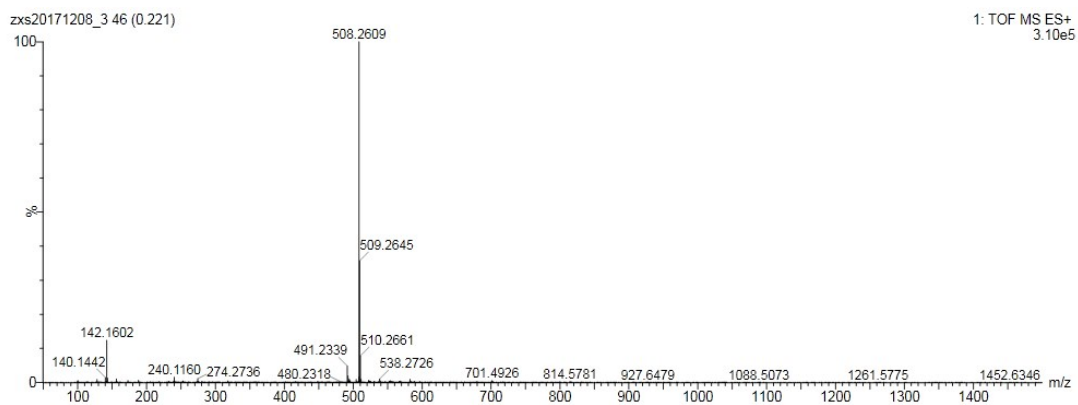

**Fig. S11** HRMS spectra of JRQ

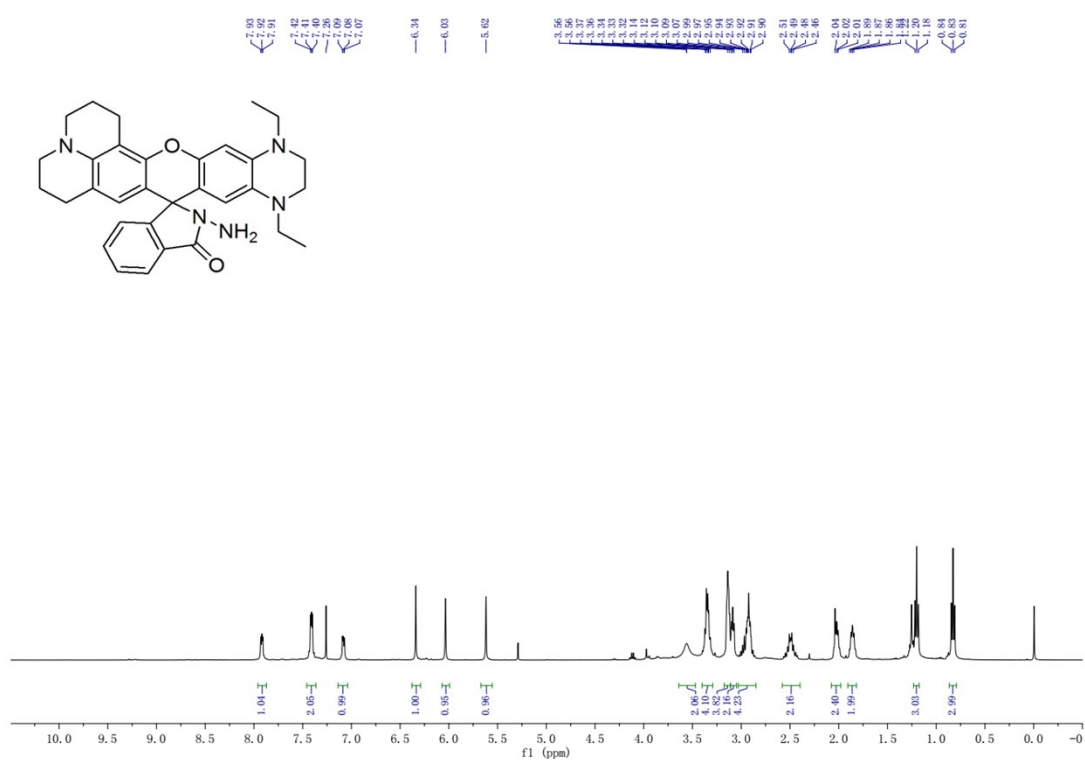

**Fig. S12**  $^1\text{H}$  NMR spectra of JRQ in  $\text{CDCl}_3$

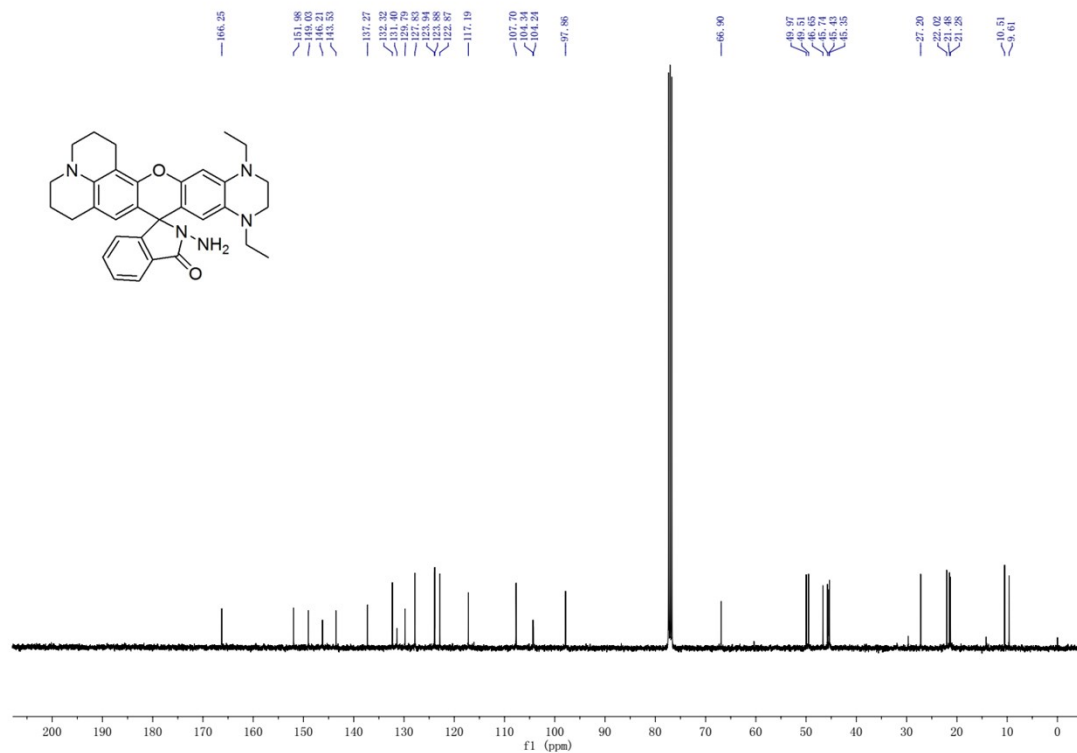

**Fig. S13** <sup>13</sup>C NMR spectra of JRQN in CDCl<sub>3</sub>

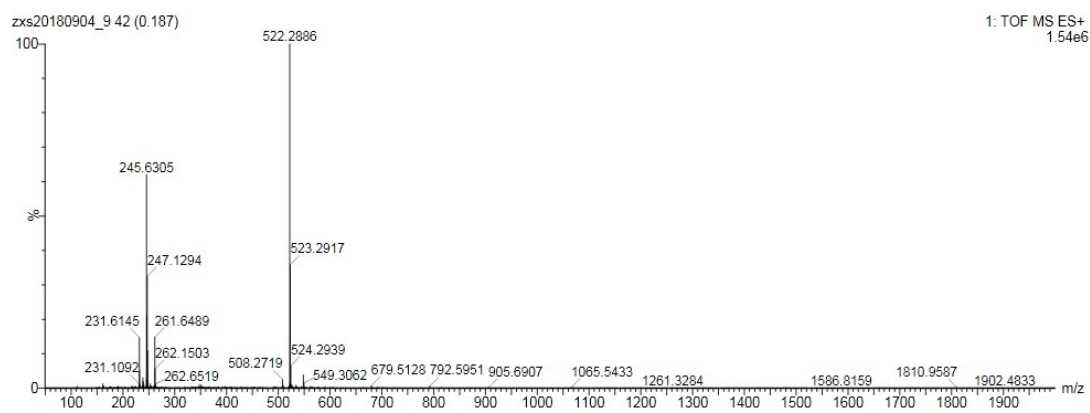

**Fig. S14** HRMS spectra of JRQN
